# Supplementary figures and images for: Assessment of air quality during worst wildfires in Turkey
Source: Research Square preprint supplement (doi:10.21203/rs.3.rs-903604/v1), 2021-09-16

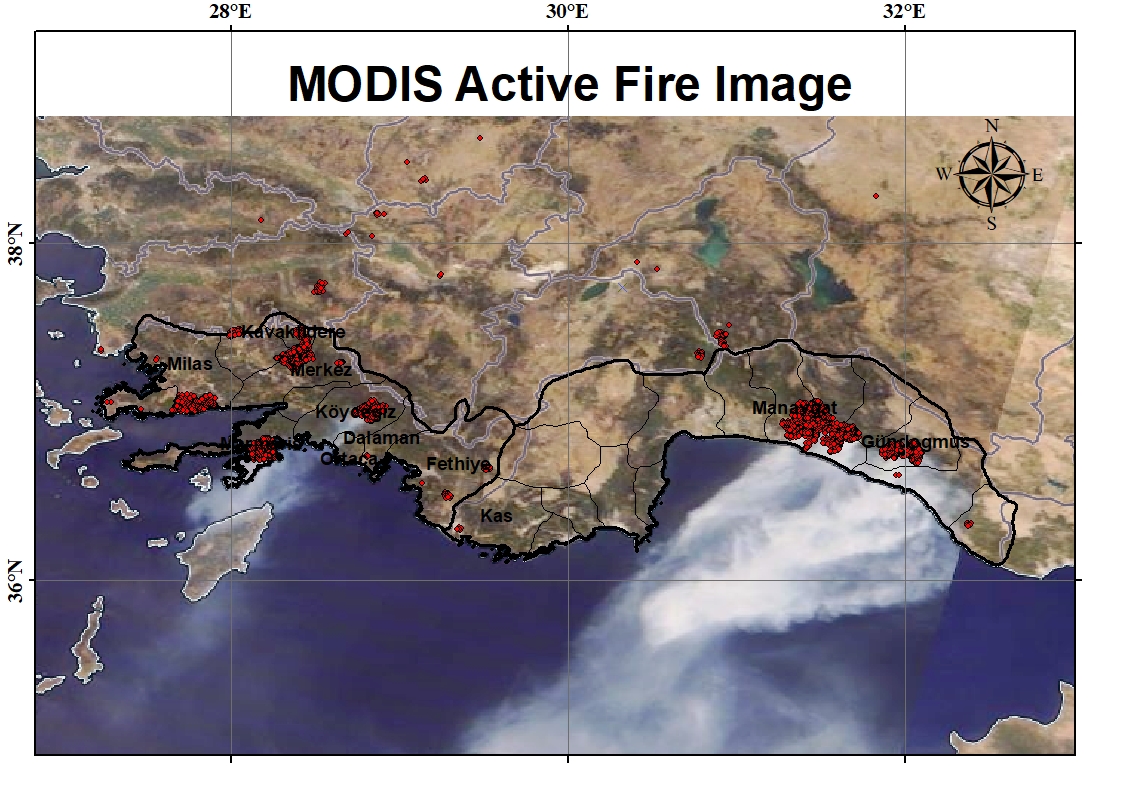

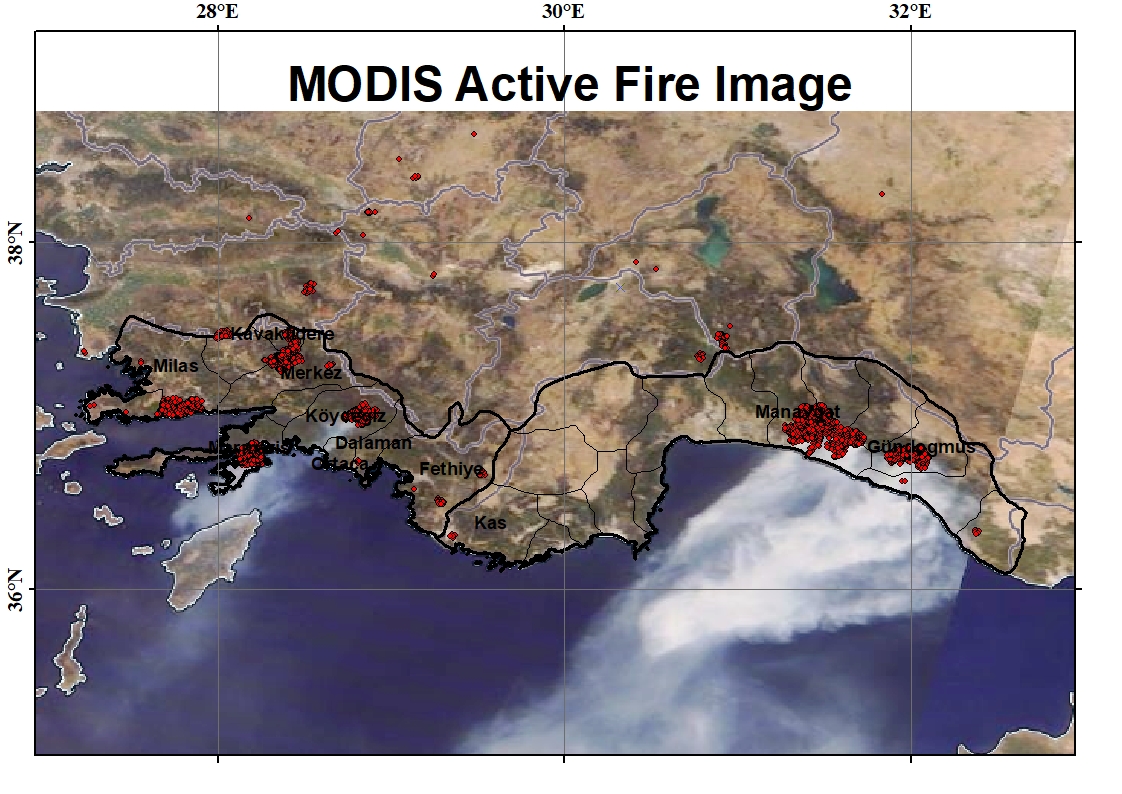
 **Graphical abstract**


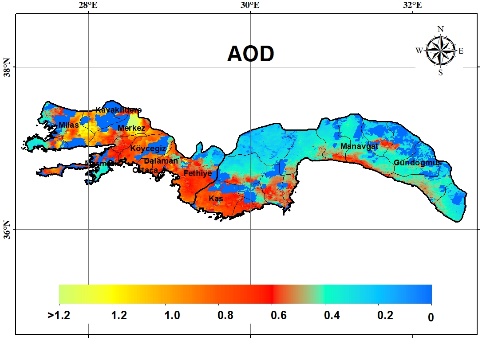


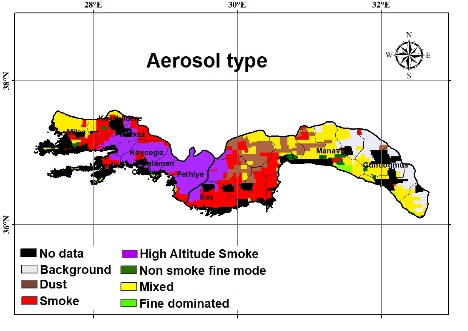

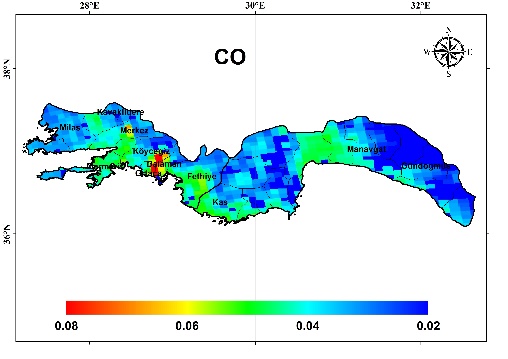

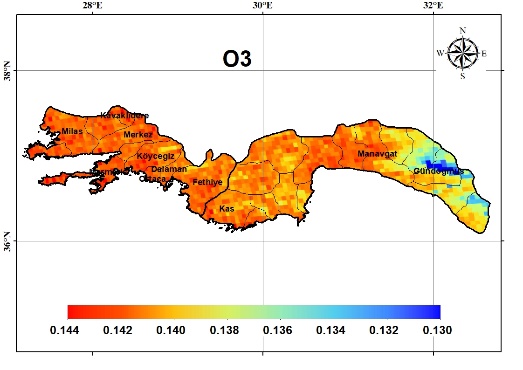

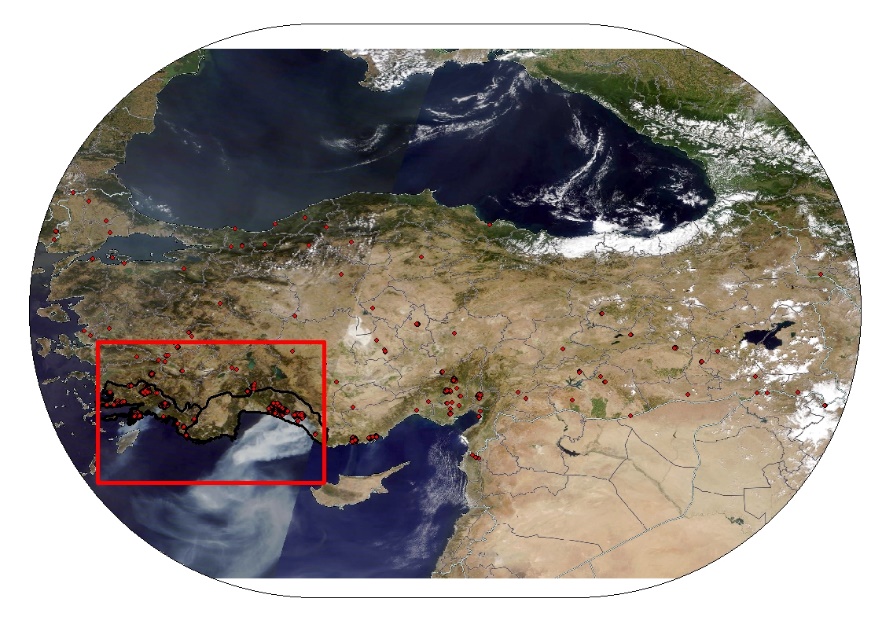


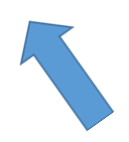


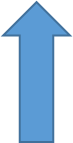


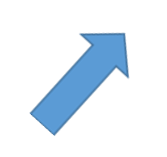

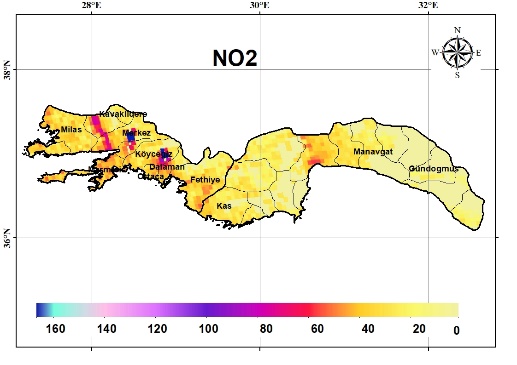


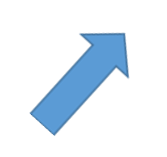

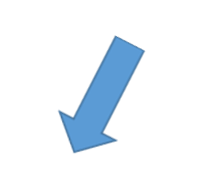

Supplement: Supplementary file 1 [file 08004fe22a71b492926b202a.docx]
